# Supplementary material for: PET-MRI nanoparticles imaging of blood–brain barrier damage and modulation after stroke reperfusion
Source: PubMed Central journal article supplement (PMC7716090; doi:10.1093/braincomms/fcaa193), 2020-11-11
Supplement: fcaa193_supplementary_data.pdf [file fcaa193_supplementary_data.pdf]

## SUPPLEMENTARY MATERIALS

**Table S1:** MRI sequences and acquisition parameters

| <b>MRI Sequence</b>                  | <b>Voxel size<br/>(mm<sup>3</sup>)</b> | <b>Number of<br/>slices</b> | <b>Acquisition<br/>time (min)</b> | <b>TR/TE<br/>(ms)</b> | <b>FOV<br/>(mm)</b> |
|--------------------------------------|----------------------------------------|-----------------------------|-----------------------------------|-----------------------|---------------------|
| <b>DWI (b-values:<br/>0. 1000)</b>   | 1.3×1.3×1.3                            | 40                          | 04:51                             | 11200/68              | 128                 |
| <b>FLAIR</b>                         | 0.8×0.8×0.8                            | 144                         | 09:20                             | 5000/419              | 160                 |
| <b>DCE-MRI<br/>AGuIX<sup>®</sup></b> | 2×2×2                                  | 22                          | 10:21<br>100 frames               | 5.2/2.5               | 128                 |
| <b>DCE-MRI Gd-<br/>DOTA</b>          | 2×2×2                                  | 22                          | 6 :13<br>60 frames                | 5.2/2.5               | 128                 |
| <b>T1 MPRAGE</b>                     | 0.6×0.6×0.6                            | 192                         | 14:40                             | 2650/4.21             | 160                 |

DCE-MRI: dynamic contrast-enhanced MRI; DWI: diffusion-weighted imaging; FLAIR: fluid attenuated inversion recovery; FOV: field of view; MRI: magnetic resonance imaging; TE: time of echo; TR: time of repetition.

**Table S2:** Physiological parameters during endovascular intervention (mean  $\pm$  SD) in n=16 NHP.

| <b>Parameters</b>                     | <b>Before stroke<br/>induction</b> | <b>During<br/>occlusion</b> | <b>After<br/>recanalization</b> |
|---------------------------------------|------------------------------------|-----------------------------|---------------------------------|
| <b>Sevoflurane in %</b>               | 1.1 $\pm$ 0.2                      | 1.3 $\pm$ 0.4               | 1.3 $\pm$ 0.3                   |
| <b>O<sub>2</sub> saturation in %</b>  | 96 $\pm$ 4                         | 96 $\pm$ 5                  | 94 $\pm$ 8                      |
| <b>CO<sub>2</sub> saturation in %</b> | 32 $\pm$ 5                         | 27 $\pm$ 3                  | 28 $\pm$ 5                      |
| <b>HR in bpm</b>                      | 133 $\pm$ 15                       | 124 $\pm$ 14                | 128 $\pm$ 18                    |
| <b>BP (in mmHg):</b>                  |                                    |                             |                                 |
| <b>Systolic</b>                       | 92 $\pm$ 6                         | 105 $\pm$ 13                | 102 $\pm$ 15                    |
| <b>Mean</b>                           | 65 $\pm$ 6                         | 76 $\pm$ 11                 | 72 $\pm$ 14                     |
| <b>Diastolic</b>                      | 39 $\pm$ 6                         | 47 $\pm$ 8                  | 44 $\pm$ 12                     |

BP: blood pressure; HR: heart rate.

## Supplementary Figure 1

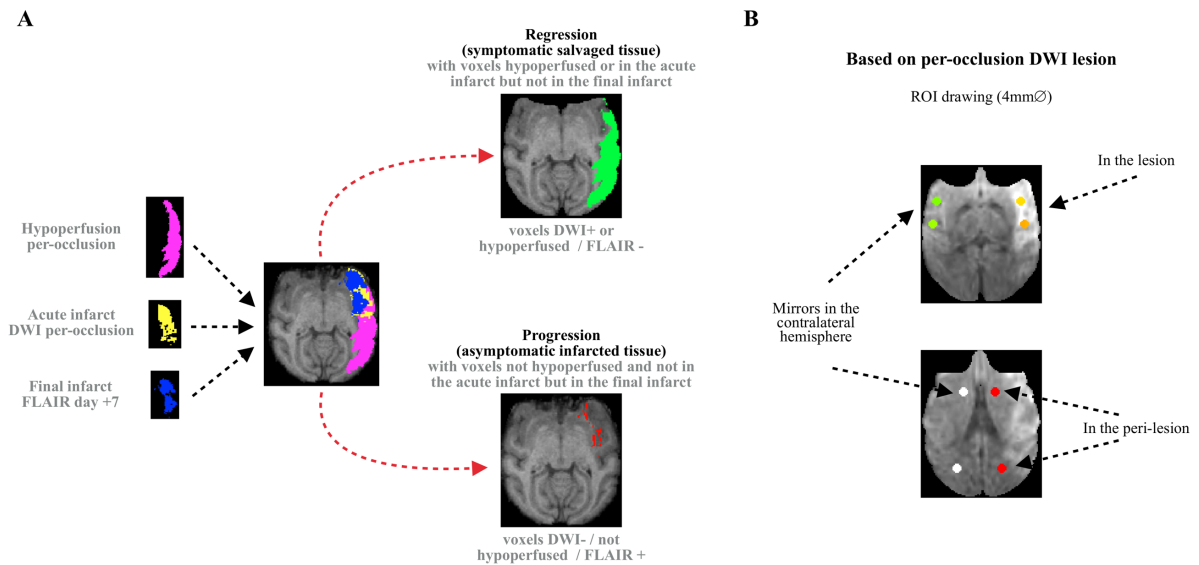

**A:** Definition of the two evolutive compartments with 1) regression or symptomatic salvaged tissue defined as voxels hypoperfused per-occlusion or in the acute infarct but not in the final infarct; and 2) progression or asymptomatic infarcted tissue with voxels not hypoperfused per-occlusion or in the acute infarct but in the final infarct.

**B:** Example of acute infarct (DWI per-occlusion) ROI definition in the lesional and peri-lesional area and corresponding contralateral ROI.

DWI: diffusion weighted imaging; ROI: region of interest.

## Supplementary Figure 2

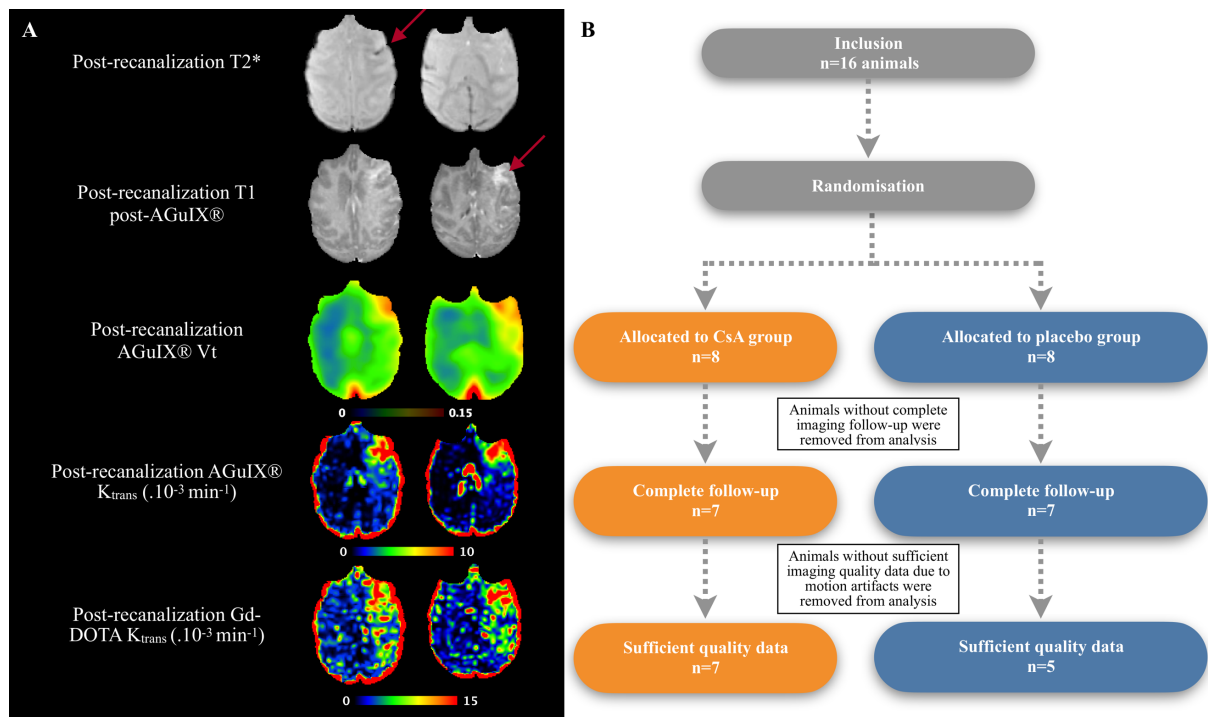

**A:** Illustration of one animal with hemorrhagic transformation. Two ROIs were placed in the hemorrhagic area. We found a mean  $K_{trans}$  value of  $9.5 (\pm 2) \times 10^{-3} \text{ min}^{-1}$  with AGuIX® NPs and  $16.6 (\pm 5.4) \times 10^{-3} \text{ min}^{-1}$  with Gd-DOTA in the hemorrhagic core.

NPs: nanoparticles; ROI: region of interest.

**B:** Flow chart showing animals selection for study.

### Supplementary Figure 3

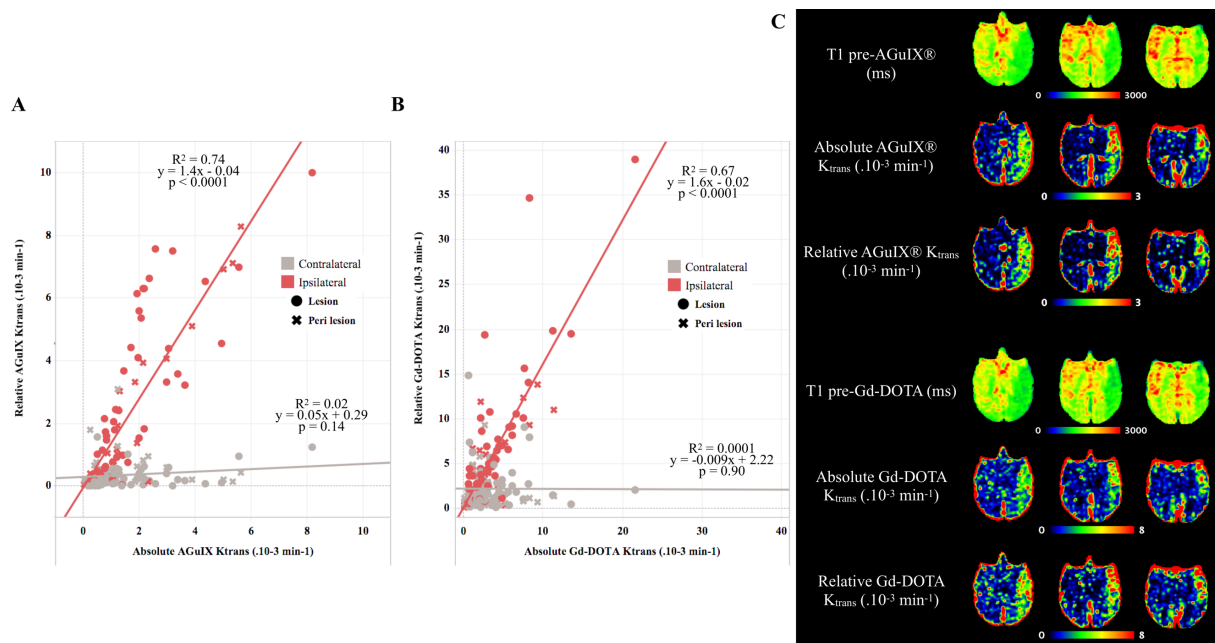

Scatter plots (**A-B**) illustrating the degree of correlation between  $K_{trans}$  and relative  $K_{trans}$  with the two contrast agents: AGuIX® NPs (**A**) in ipsilateral (red circles ;  $r^2=0.74$ ;  $p<0.001$ ) and contralateral (gray circles;  $r=0.02$ ;  $p=0.14$ ) hemispheres ( $n= 51$  ROIs in lesions, dots;  $n= 45$  ROIs in peri-lesion, crosses). Gd-DOTA (**B**) in ipsilateral (red circles;  $r^2=0.67$ ;  $p<0.001$ ) and contralateral (gray circles;  $r=0.001$ ;  $p=0.90$ ) hemispheres ( $n= 51$  ROIs in lesions, dots;  $n= 45$  ROIs in peri-lesion, crosses). Illustration (**C**) of T1 pre-contrast agents, absolute and relative  $K_{trans}$  with AGuIX® NPs and Gd-DOTA in one animal at post-recanalization.

NPs: nanoparticles; ROI: region of interest.

## Supplementary Figure 4

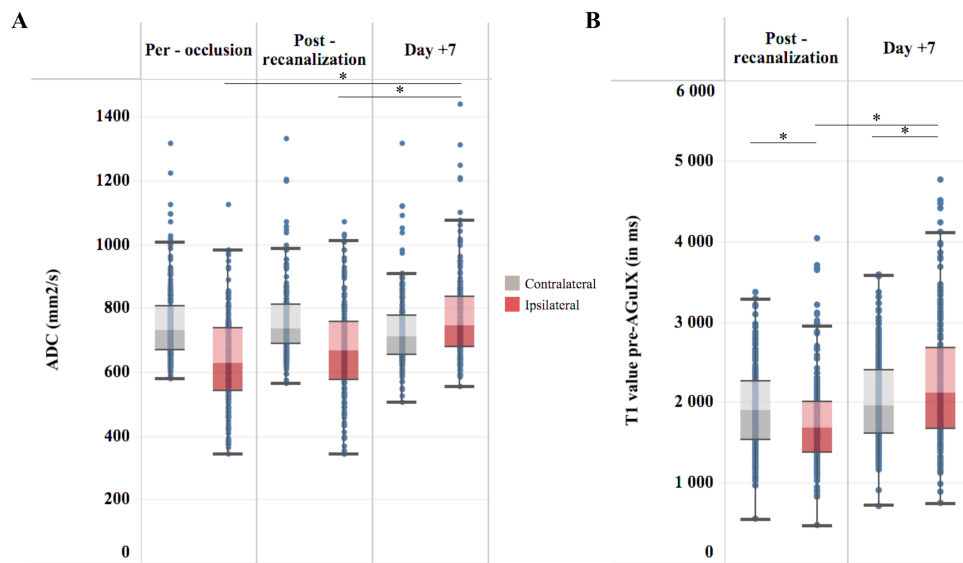

Boxplots of per-occlusion, post-recanalization, and day+7 ADC (**A**), or pre-contrast T1 (**B**) values in ROIs (n=93) in ipsilateral (red) and corresponding contralateral (gray) hemisphere.

A: \*  $p < 0.05$ , Friedman test and Dunn test for multiple comparisons

B: \*  $p < 0.05$ , paired Wilcoxon test

ADC: apparent diffusion coefficient; ROI : region of interest.

## Supplementary Figure 5

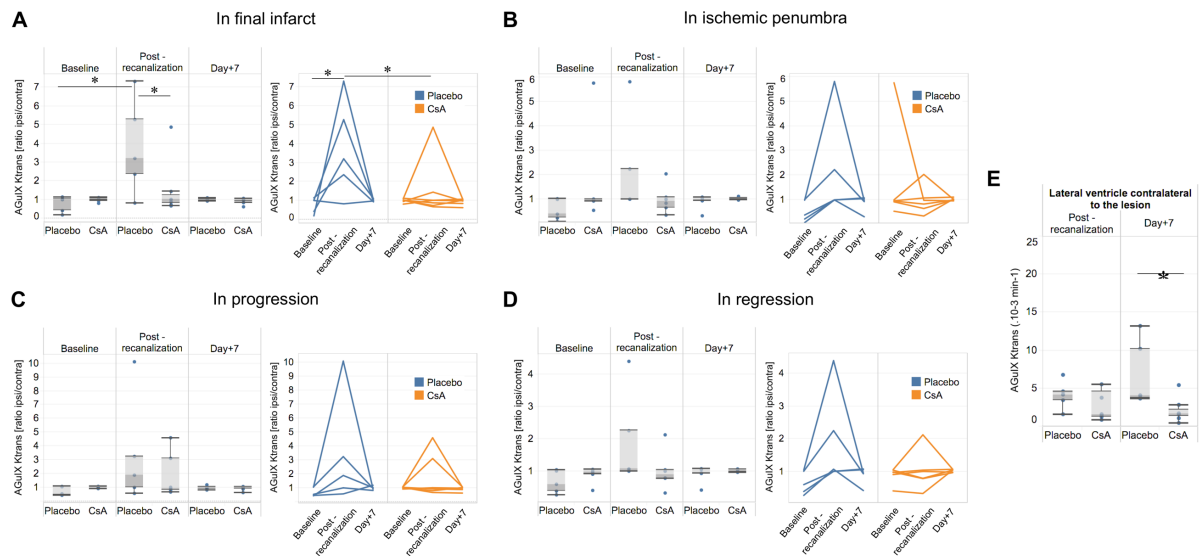

Longitudinal evolution in the final infarct (**A**), ischemic penumbra (**B**), progression (**C**) and regression regions (**D**) of normalized AGuIX<sup>®</sup> NPs  $K_{trans}$  in the two treatment groups (n=5 animals in the placebo group and n=7 animals in the CsA group) represented as boxplots (left) or individual values (right). Although not significant, the choroid plexus in the hemisphere contralateral to the lesion (**E**) showed decreased post-recanalization  $K_{trans}$  in the CsA-treated group, which persisted and became significantly lower at day 7 in the group treated with AGuIX<sup>®</sup> NPs.

A, B, C: \*  $p < 0.05$  two-way repeated measures ANOVA followed by post-hoc Bonferroni test for multiple comparisons.

D: \*  $p < 0.05$  non-parametric Mann-Whitney test.

NPs: nanoparticles; ANOVA: analysis of variance
